#### EDITORIAL NOTE

## Editorial Note: A high-quality severe combined immunodeficiency (SCID) rat bioresource

The *PLOS One* Editors

The *PLOS One* Editors issue this Editorial Note because this article [1] was identified as one of a series of submissions for which we have concerns about aspects of the peer review process. Readers are advised to interpret the article [1] with caution.

The Editors have no evidence of any author involvement in the peer review concerns.

### Reference

1. Miyasaka Y, Wang J, Hattori K, Yamauchi Y, Hoshi M, Yoshimi K, et al. A high-quality severe combined immunodeficiency (SCID) rat bioresource. *PLoS One*. 2022;17(8):e0272950. <https://doi.org/10.1371/journal.pone.0272950> PMID: [35960733](https://pubmed.ncbi.nlm.nih.gov/35960733/)

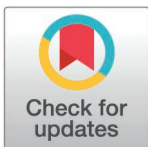

---

### OPEN ACCESS

**Citation:** The *PLOS One* Editors (2026) Editorial Note: A high-quality severe combined immunodeficiency (SCID) rat bioresource. *PLoS One* 21(5): e0348422. <https://doi.org/10.1371/journal.pone.0348422>

**Published:** May 1, 2026

**Copyright:** © 2026 The *PLOS One* Editors. This is an open access article distributed under the terms of the [Creative Commons Attribution License](https://creativecommons.org/licenses/by/4.0/), which permits unrestricted use, distribution, and reproduction in any medium, provided the original author and source are credited.
